# Supplementary figures and images for: Morphology and orientation change of layer-by-layer deposited one- and two-dimensional coordination polymer nanocrystals containing rhodium paddle-wheel units
Source: Royal Society of Chemistry journal article supplement (doi:10.1039/d3ce00721a), 2023-01-01

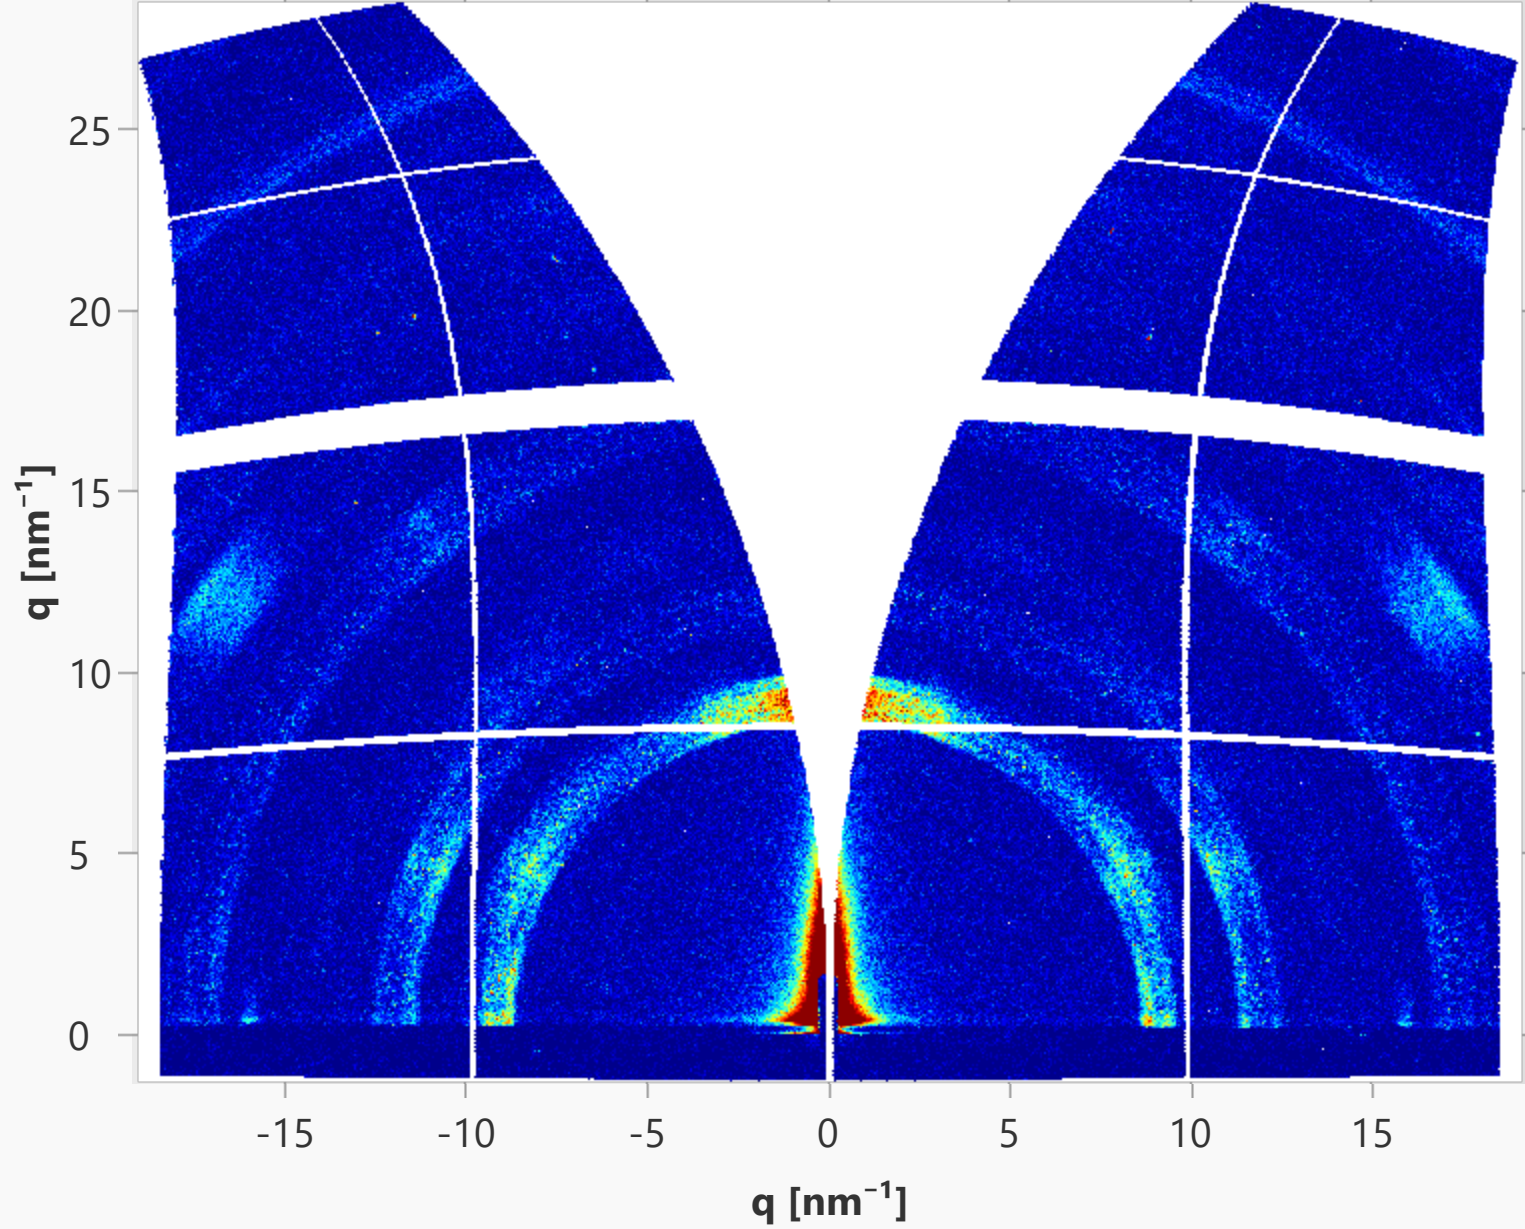

Supplement: d3ce00721a1.zip [file d3ce00721a1.zip]

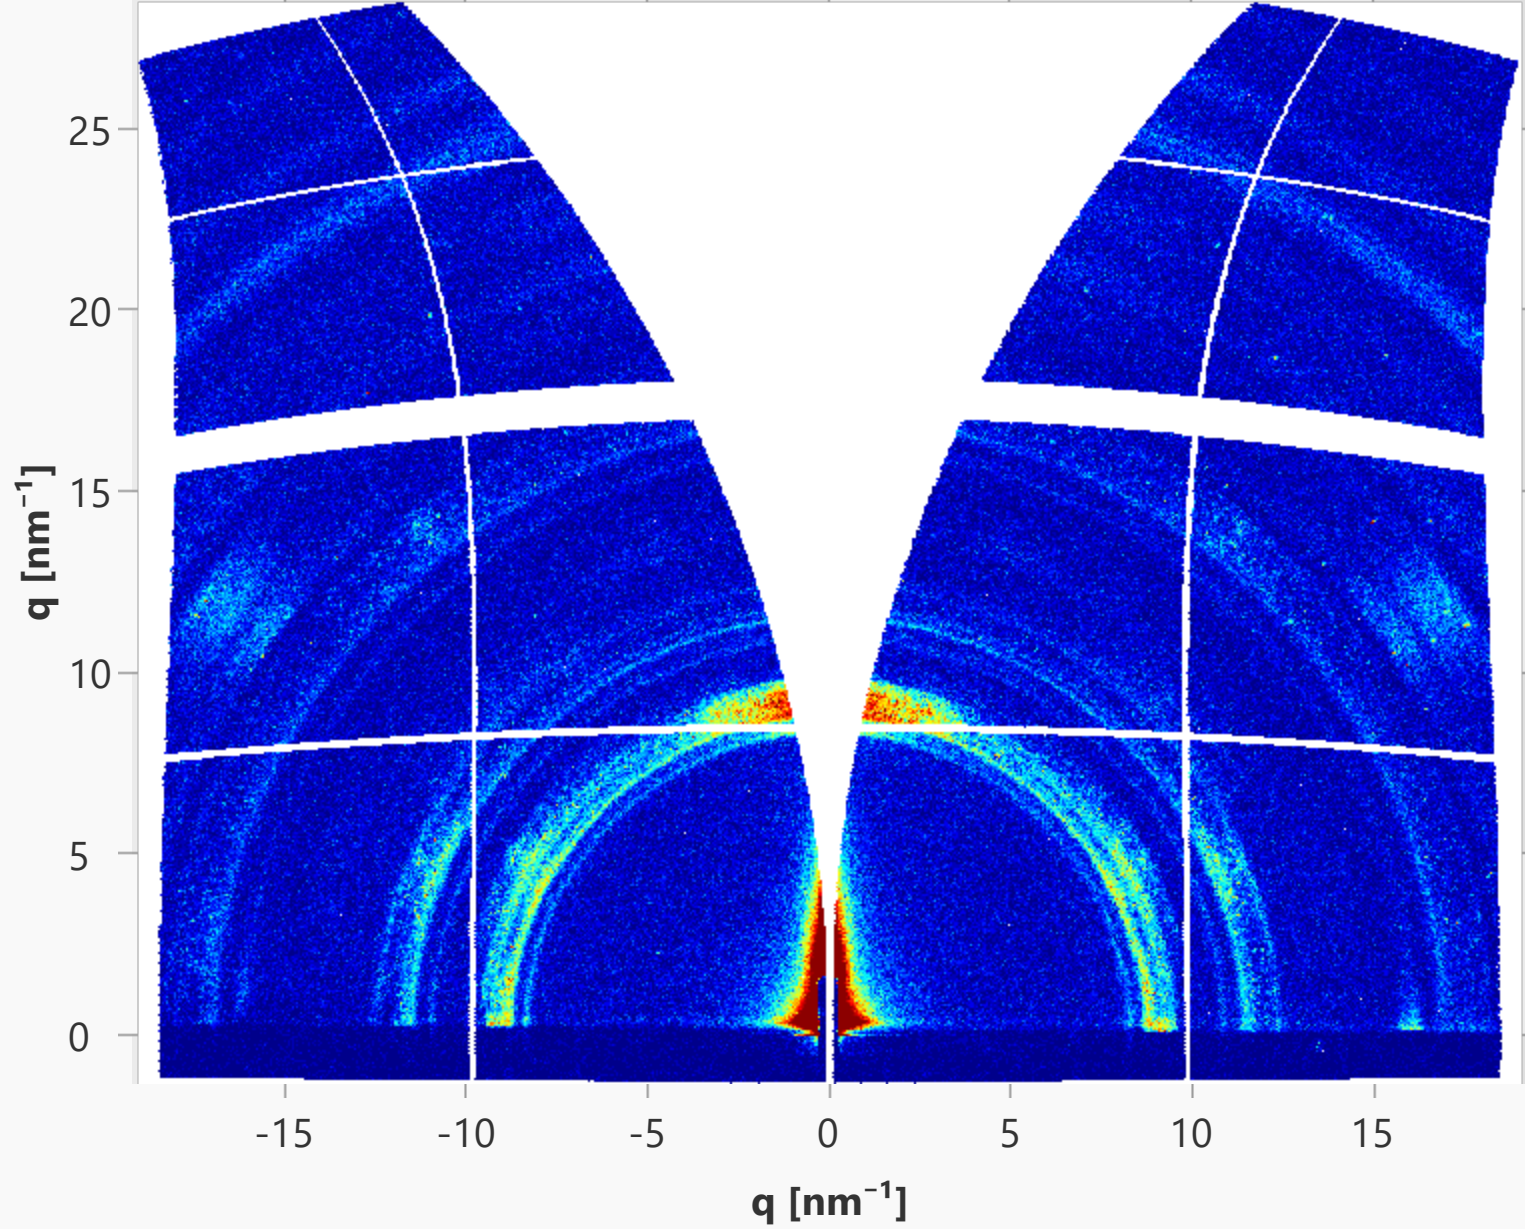

Supplement: d3ce00721a1.zip [file d3ce00721a1.zip]

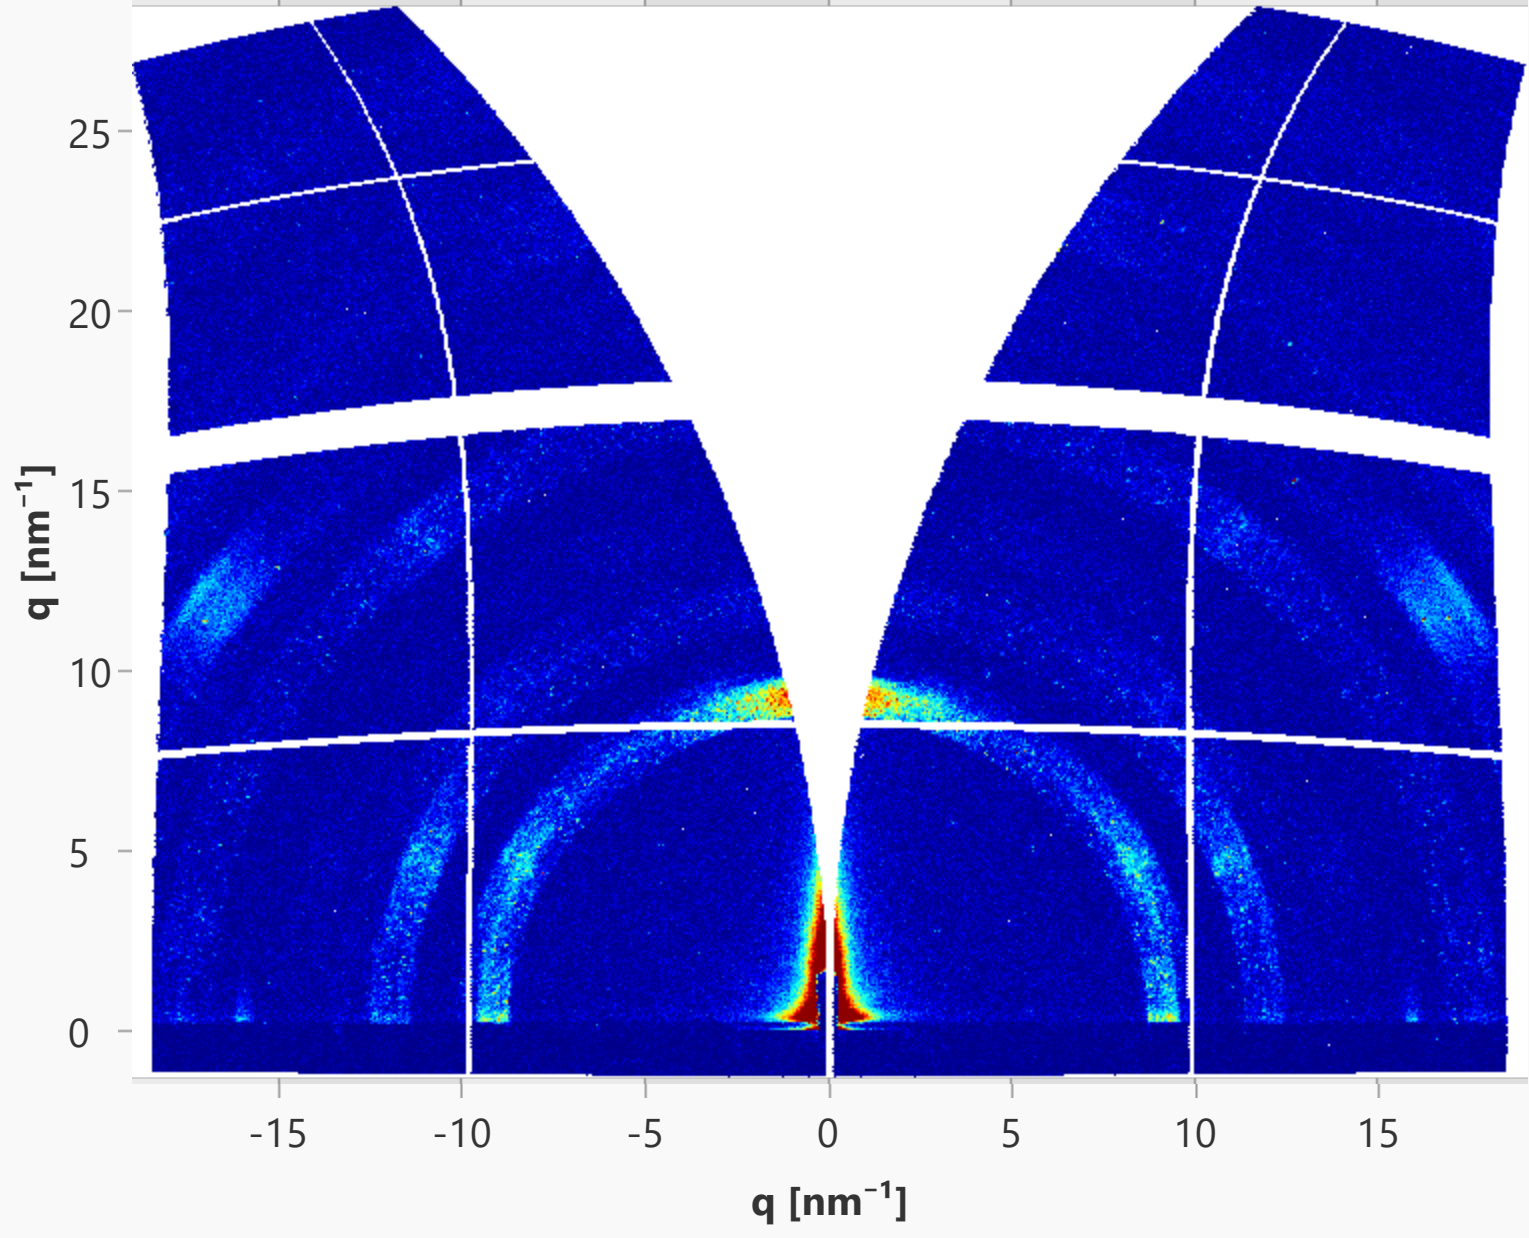

Supplement: d3ce00721a1.zip [file d3ce00721a1.zip]

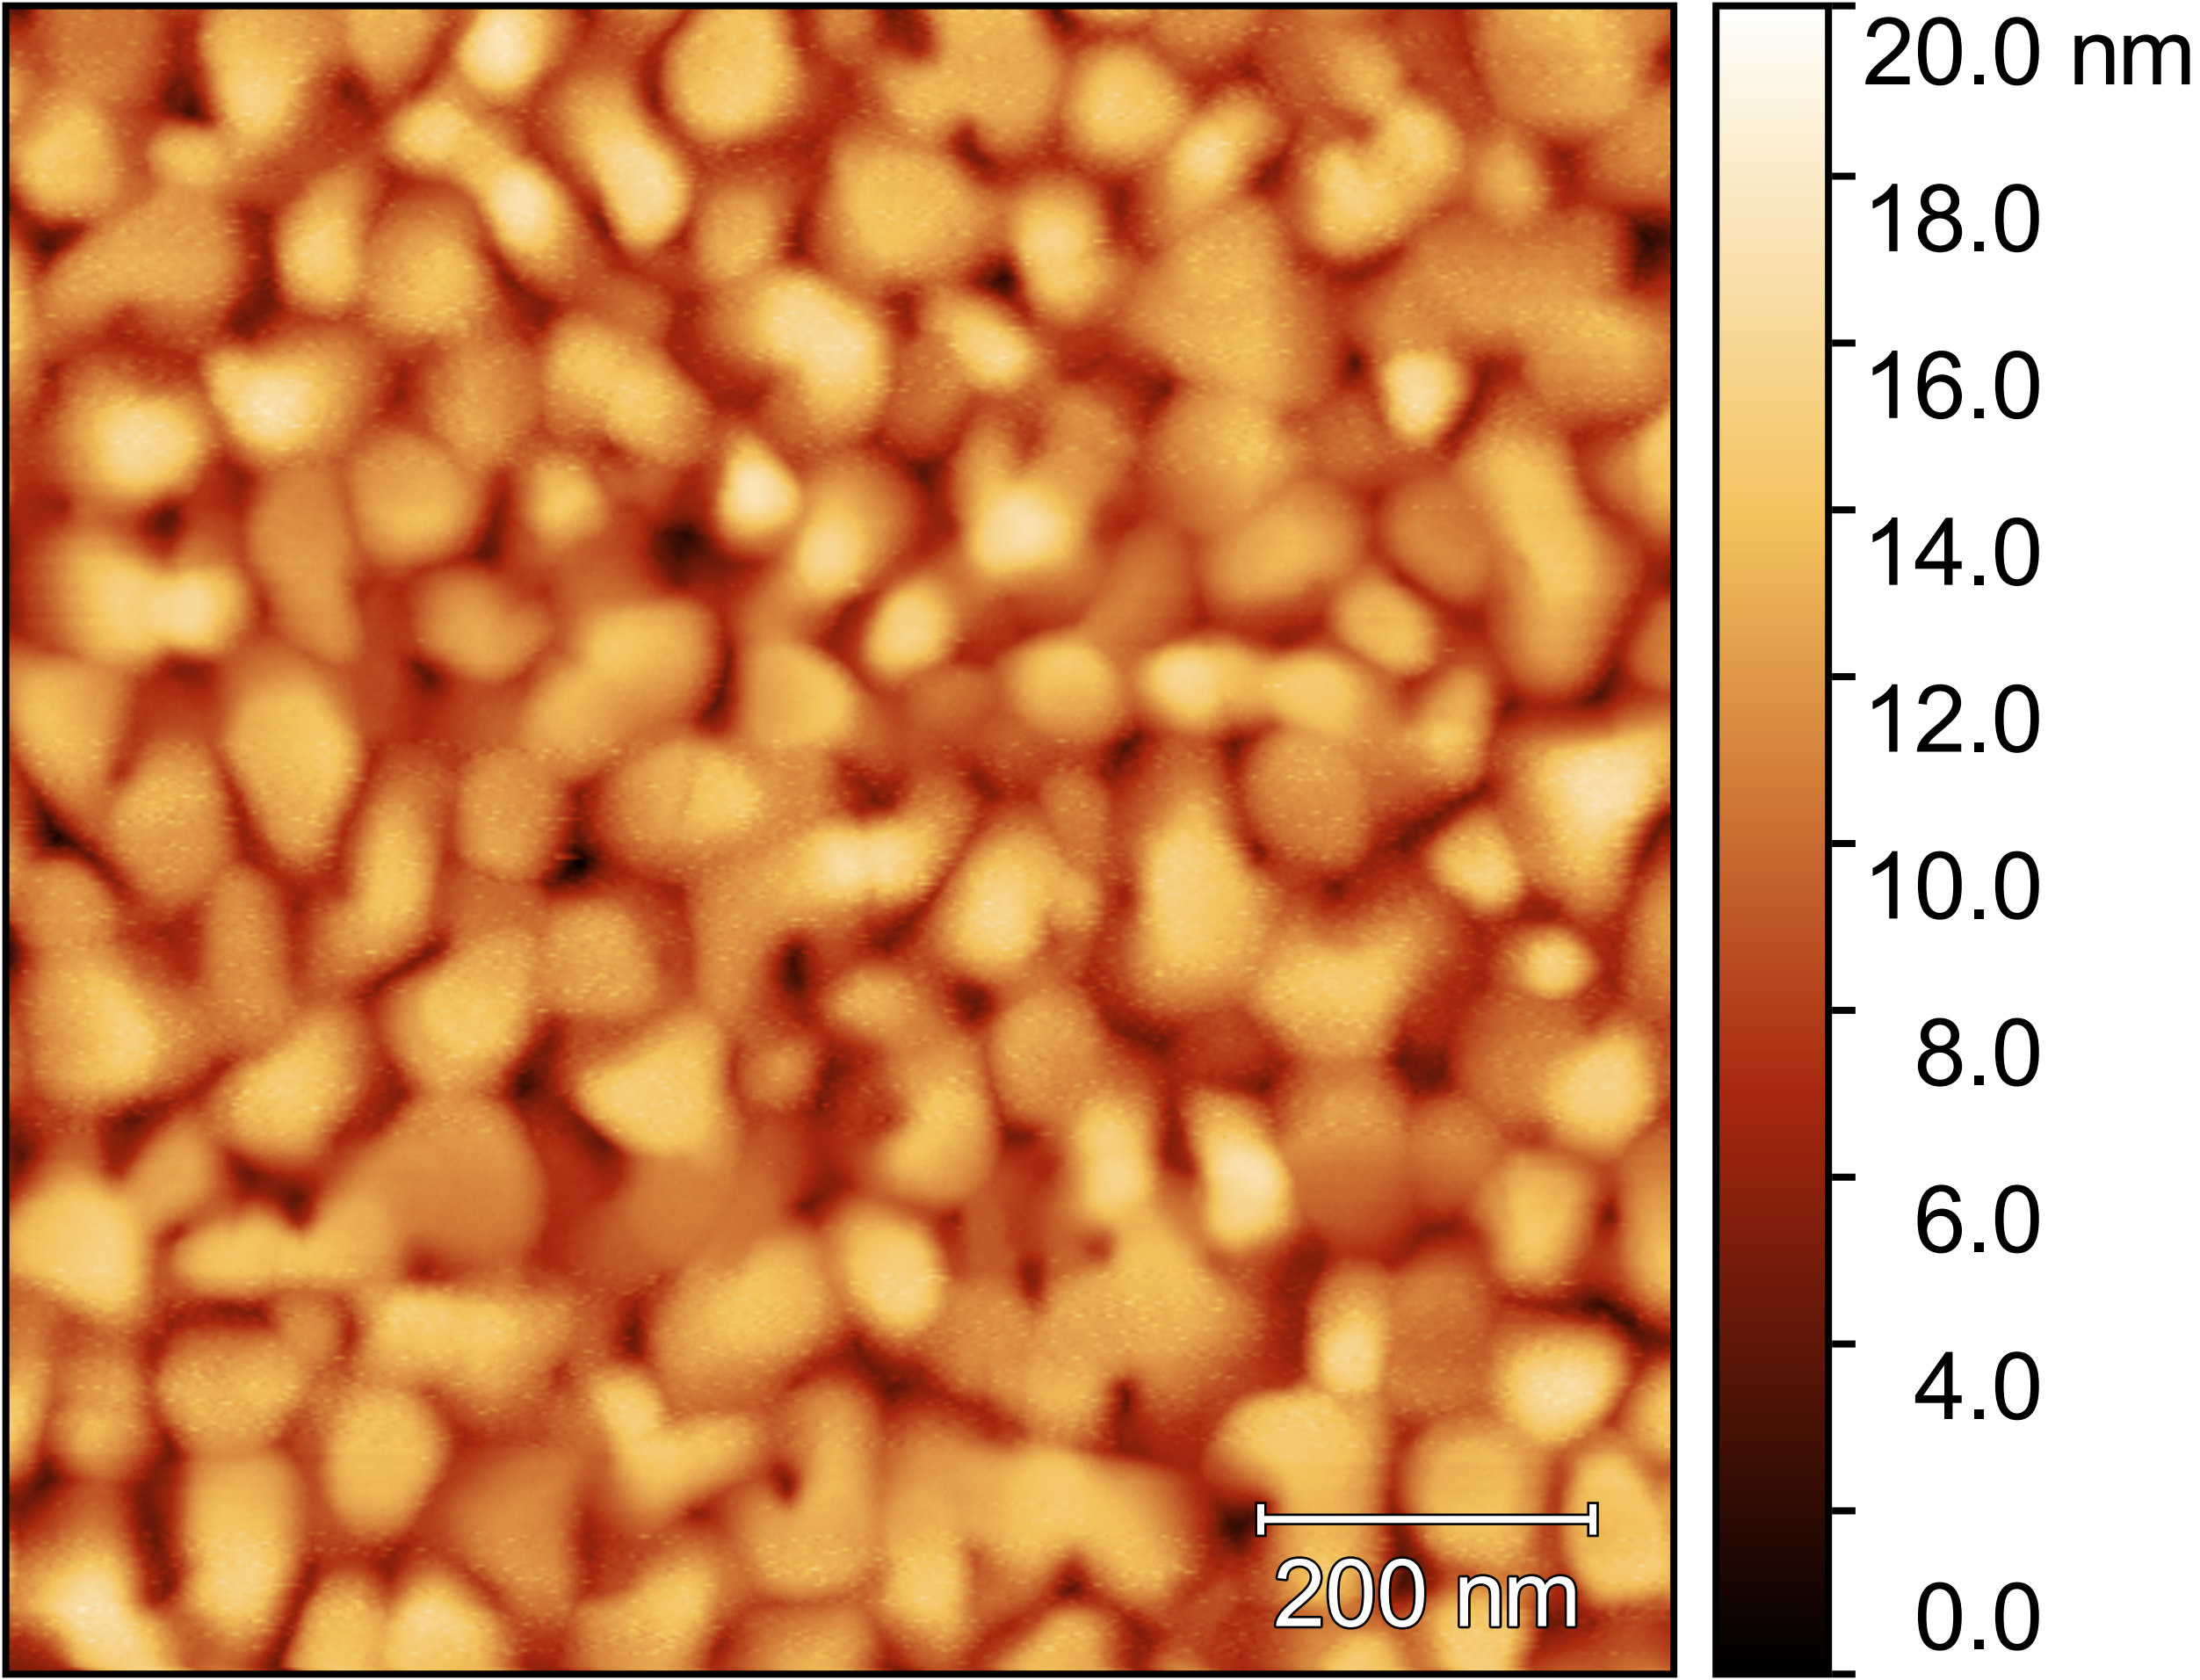

Supplement: d3ce00721a1.zip [file d3ce00721a1.zip]

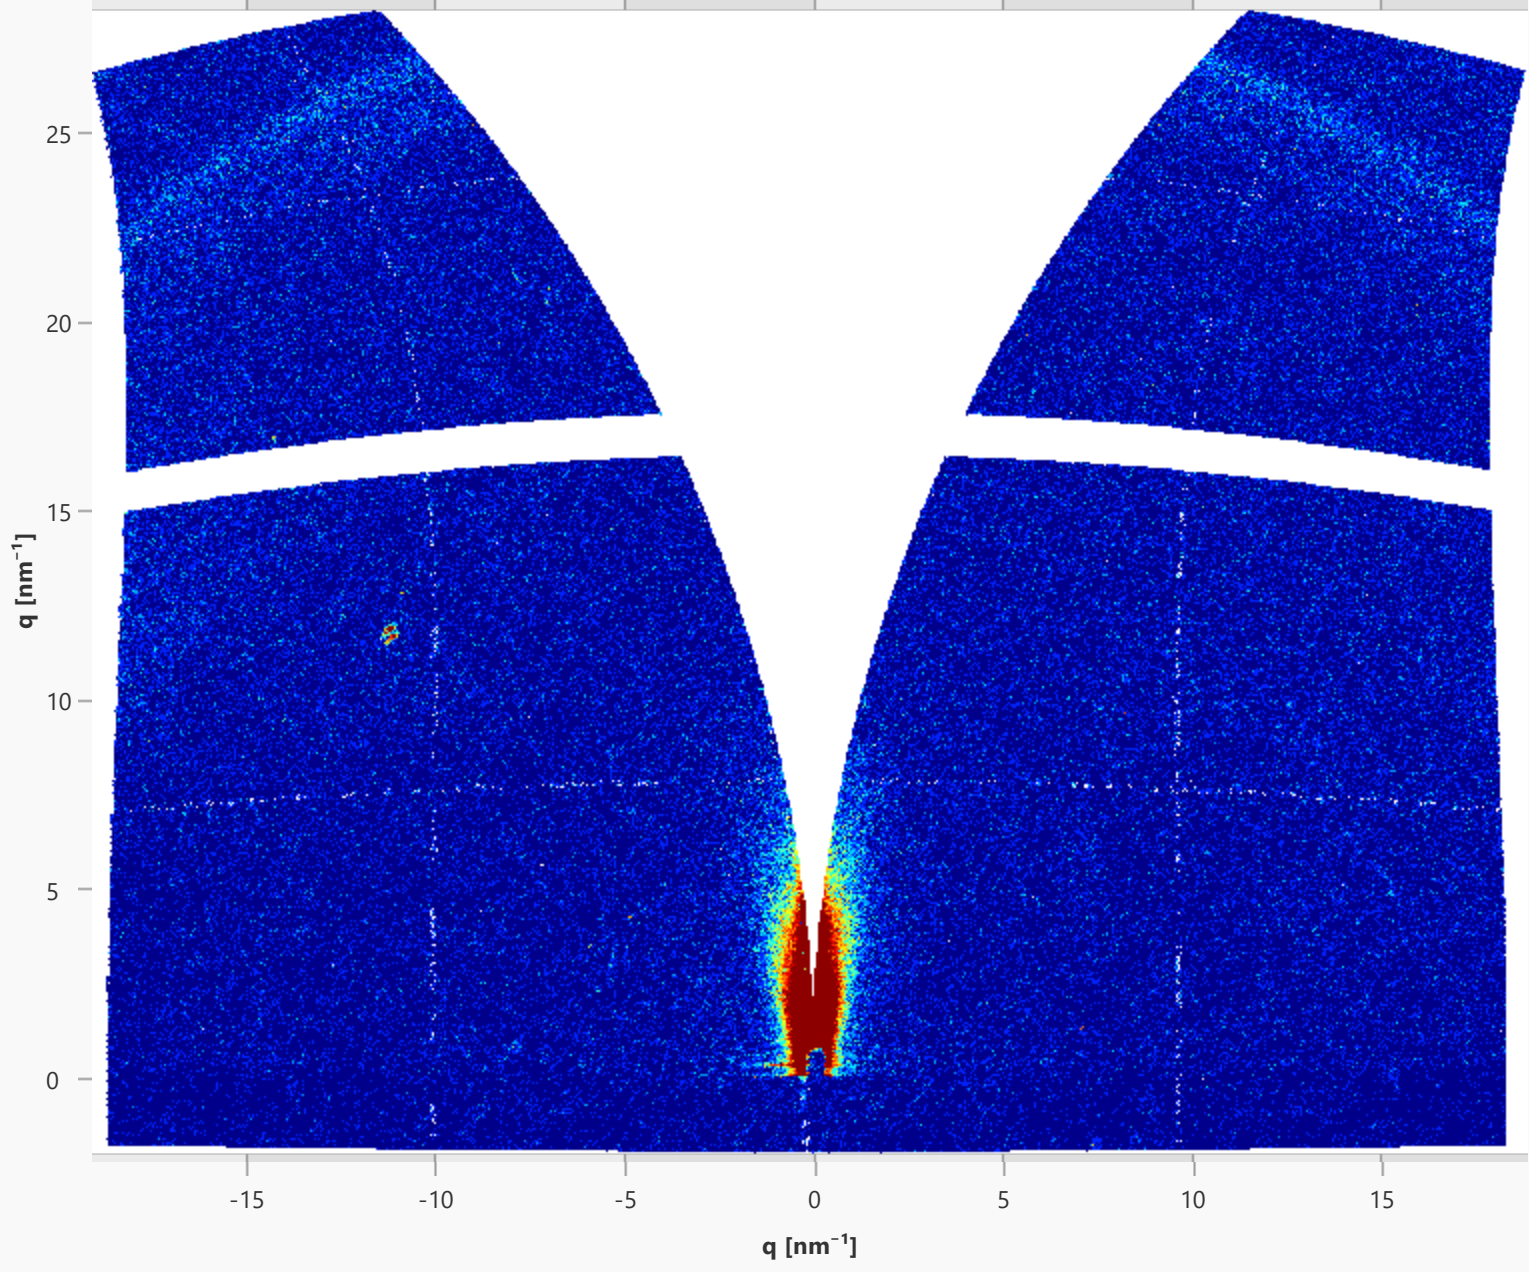

Supplement: d3ce00721a1.zip [file d3ce00721a1.zip]

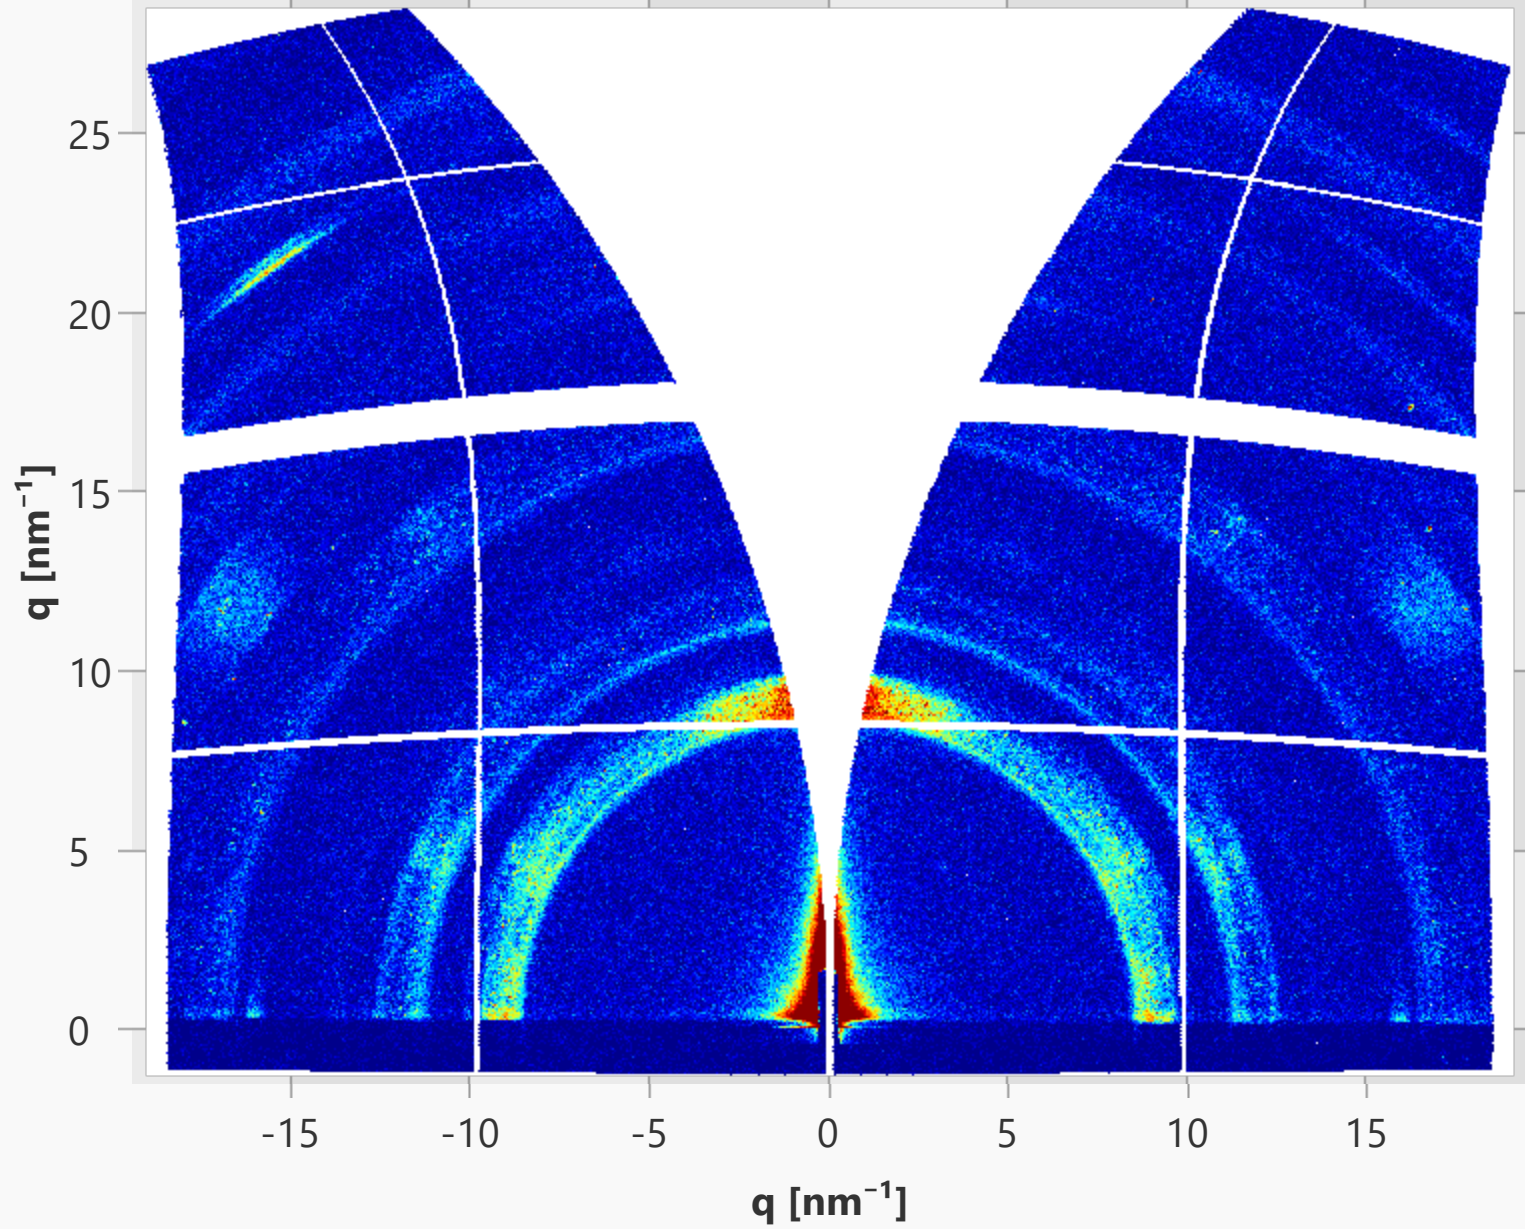

Supplement: d3ce00721a1.zip [file d3ce00721a1.zip]

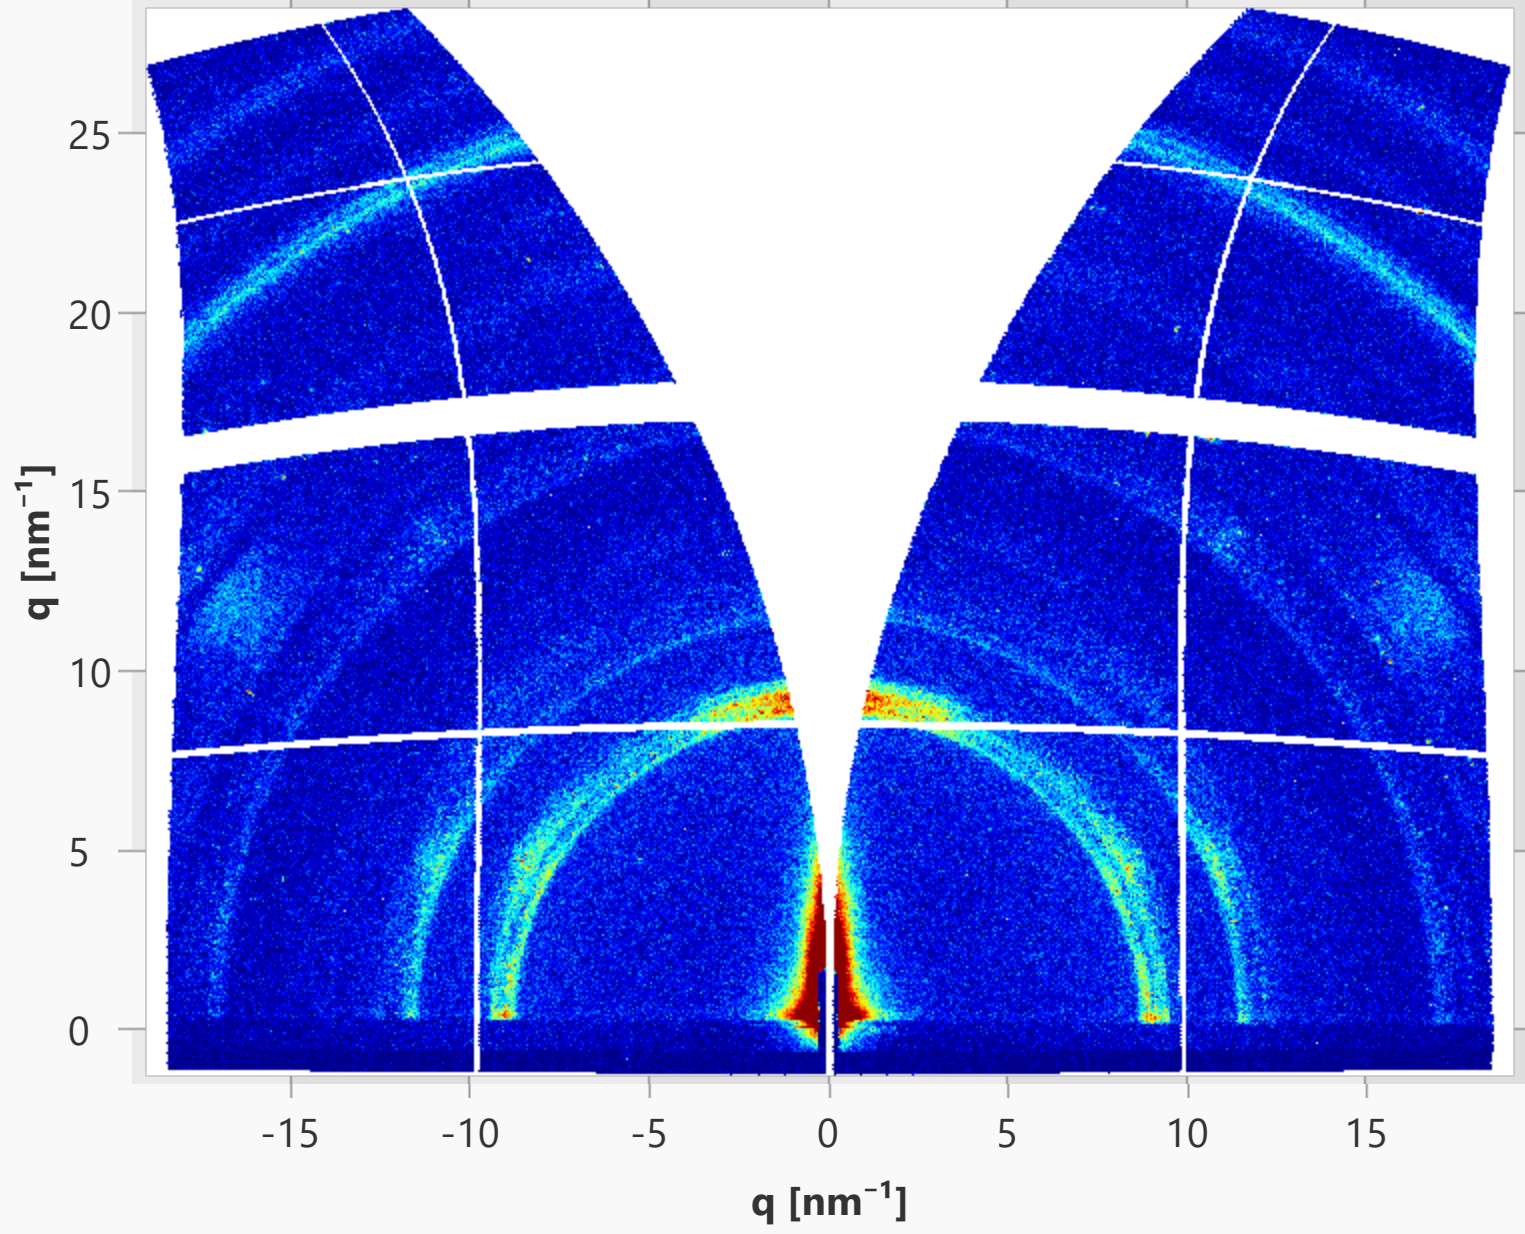

Supplement: d3ce00721a1.zip [file d3ce00721a1.zip]
